# Supplementary material for: Resting-State Functional Connectivity following Phonological Component Analysis: The Combined Action of Phonology and Visual Orthographic Cues
Source: MDPI journal article supplement (doi:10.3390/brainsci11111458), 2021-11-02
Supplement: s1 [file s1]

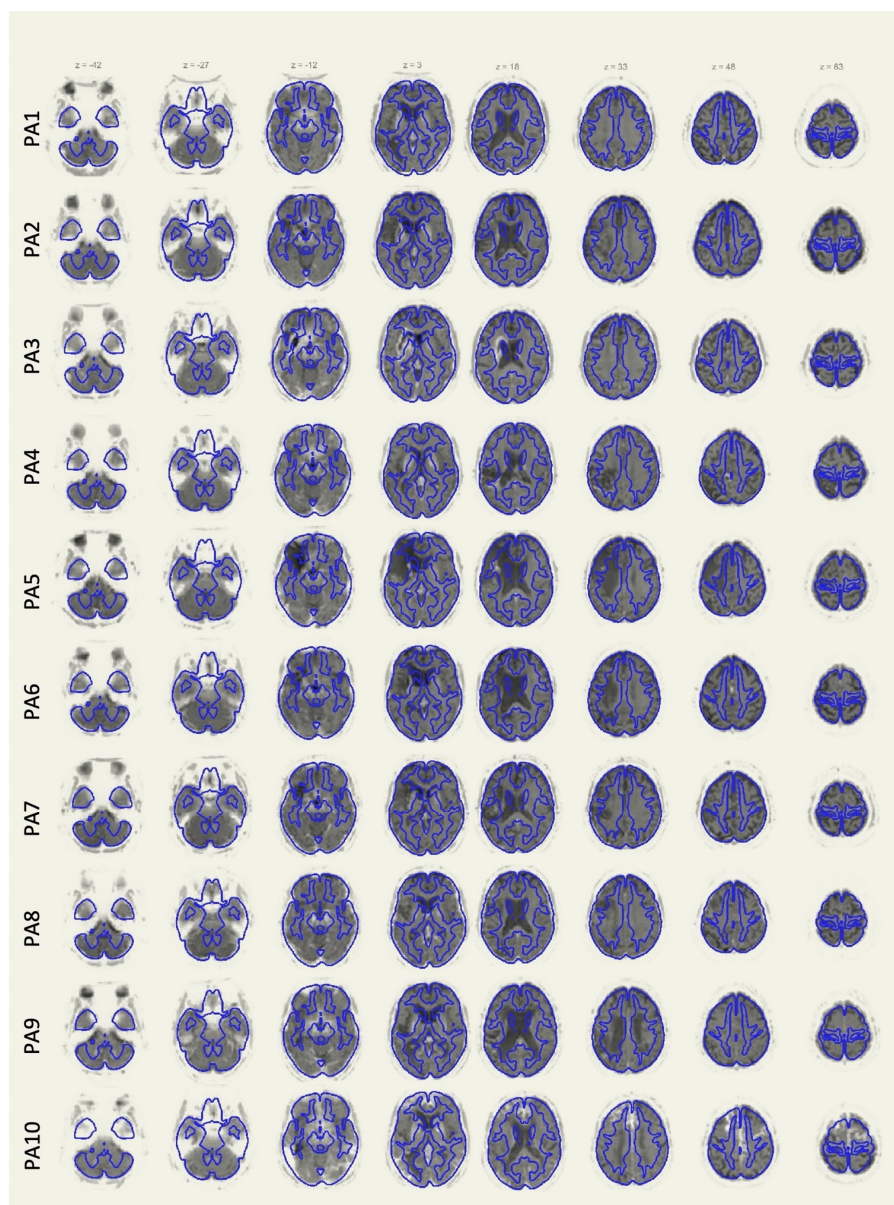

**Figure S1.** Registration quality comparison for each subject showing co-registered image overlapped to EPI template.
